# Supplementary material for: Liquid phase oxidation of glycerol in batch and flow-type reactors with oxygen over Au–Pd nanoparticles stabilized in anion-exchange resin
Source: Royal Society of Chemistry journal article supplement (doi:10.1039/c4ra04960h), 2014-01-01
Supplement: c4ra04960h1.pdf [file c4ra04960h1.pdf]

# Supporting information 1

All STEM images for measuring particle size distribution (Catalyst No.1)

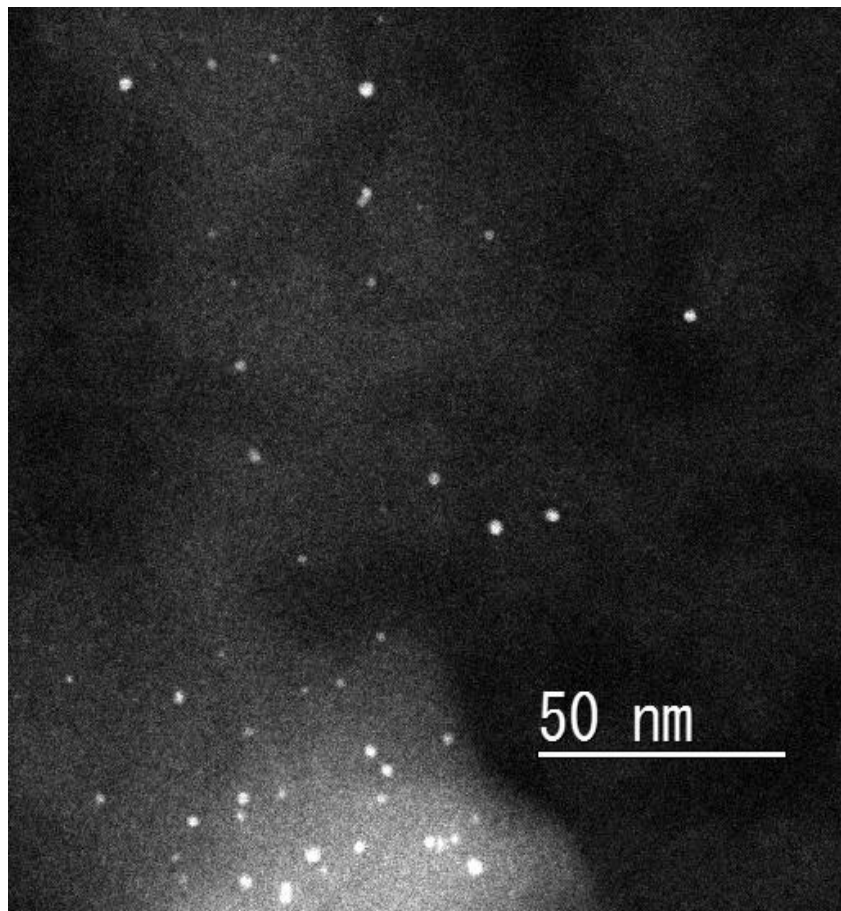

(Au+Pd) ion exchange  $\rightarrow$  reduction  
(Catalyst No. 1 in Table 1)  
STEM image 1-1

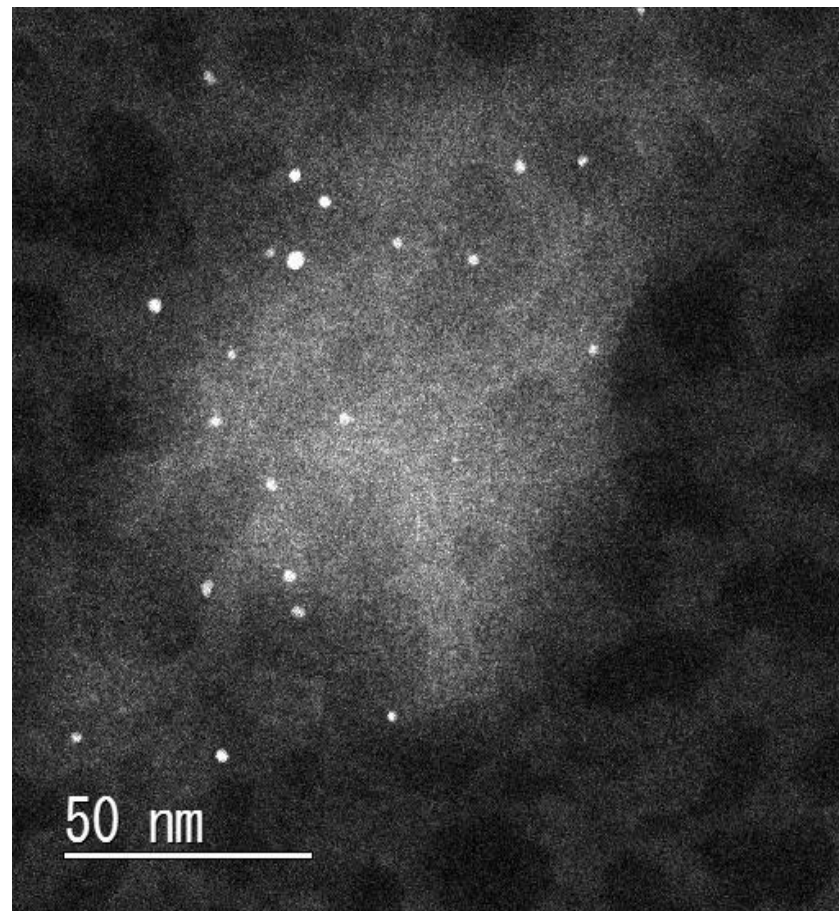

(Au+Pd) ion exchange  $\rightarrow$  reduction  
(Catalyst No. 1 in Table 1)  
STEM image 1-2

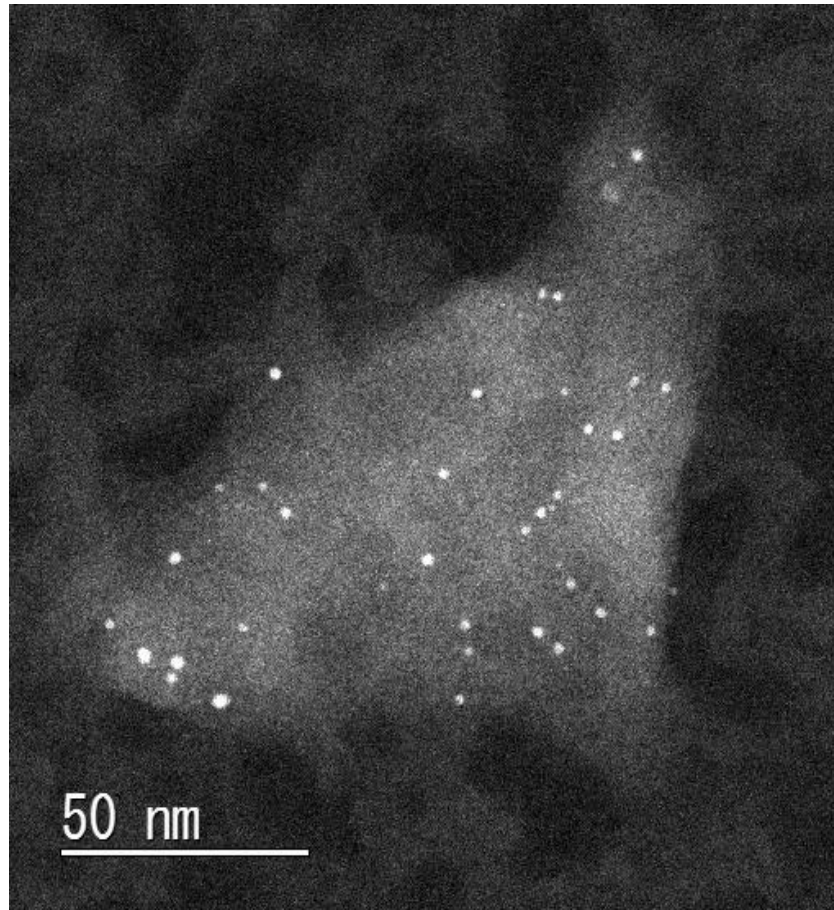

(Au+Pd) ion exchange  $\rightarrow$  reduction  
(Catalyst No. 1 in Table 1)  
STEM image 1-3

All STEM images for measuring particle size distribution (Catalyst No.2)

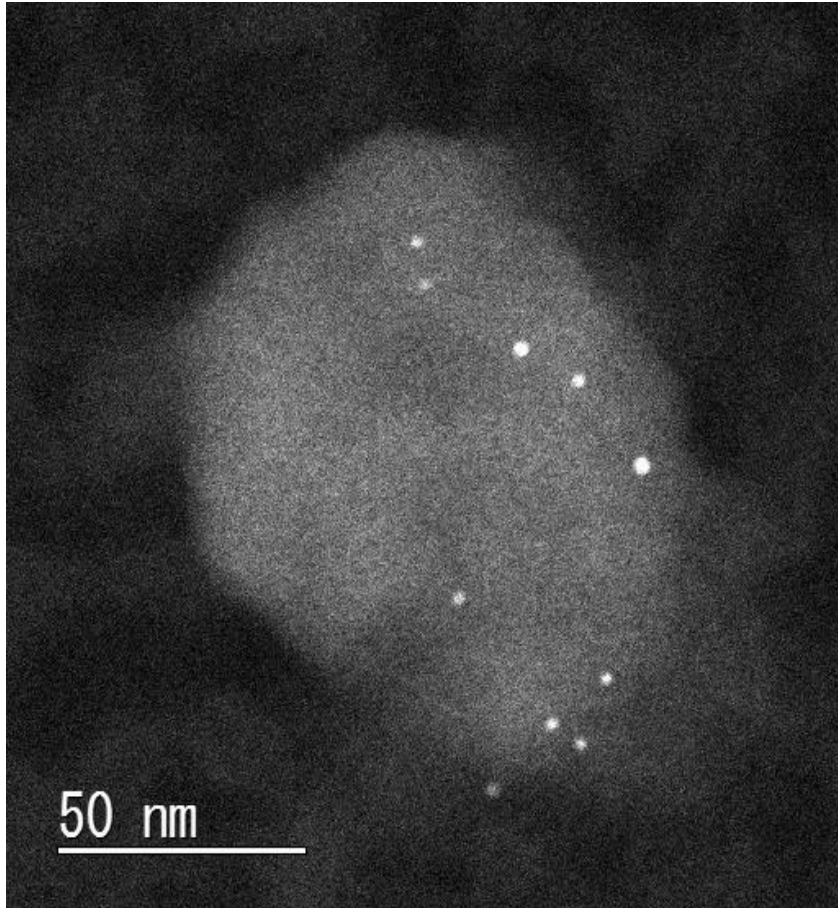

Au ion exchange  $\rightarrow$  reduction  $\rightarrow$   
Pd ion exchange  $\rightarrow$  reduction  
(Catalyst No. 2 in Table 1)  
STEM image 2-1

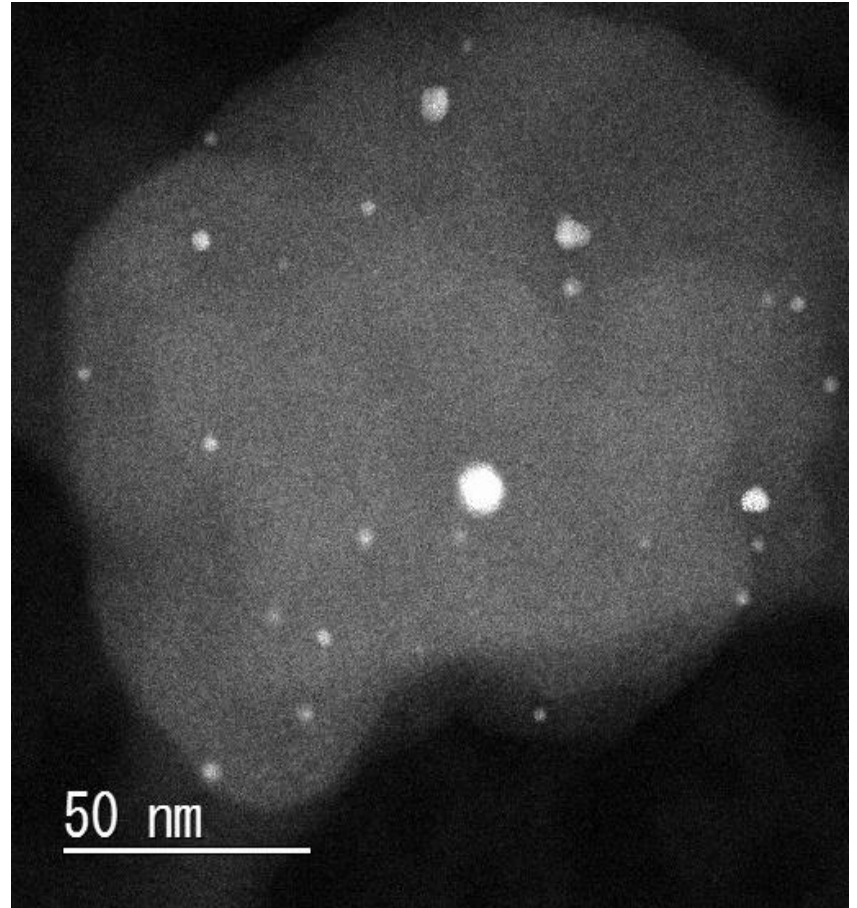

Au ion exchange  $\rightarrow$  reduction  $\rightarrow$   
Pd ion exchange  $\rightarrow$  reduction  
(Catalyst No. 2 in Table 1)  
STEM image 2-2

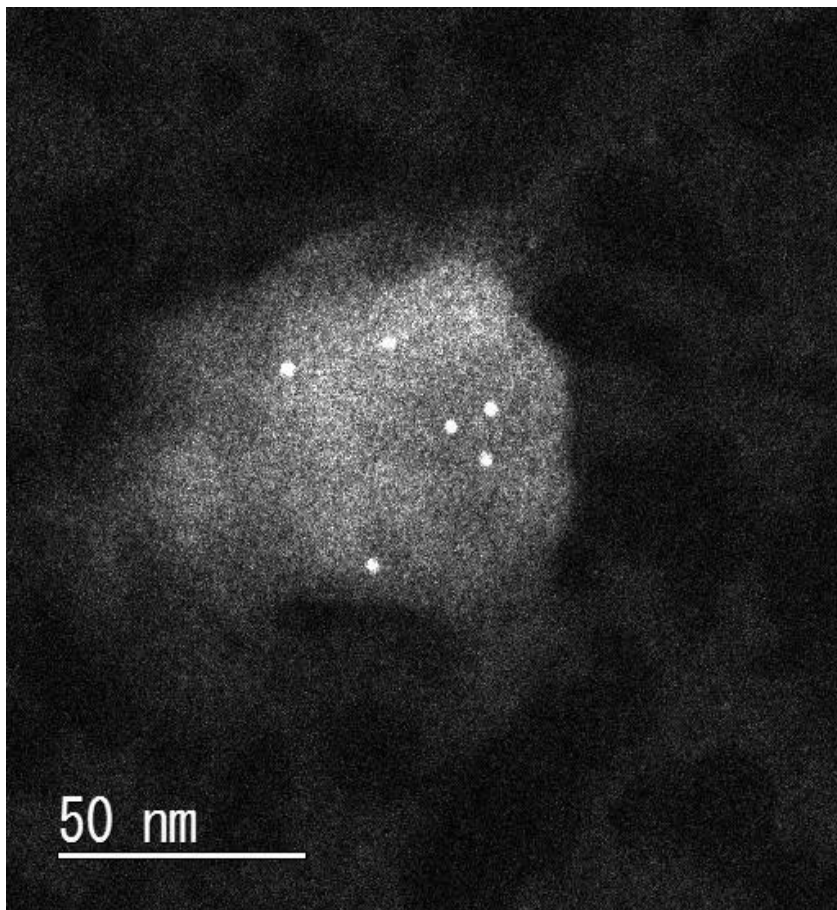

Au ion exchange → reduction →  
Pd ion exchange → reduction  
(Catalyst No. 2 in Table 1)  
STEM image 2-3

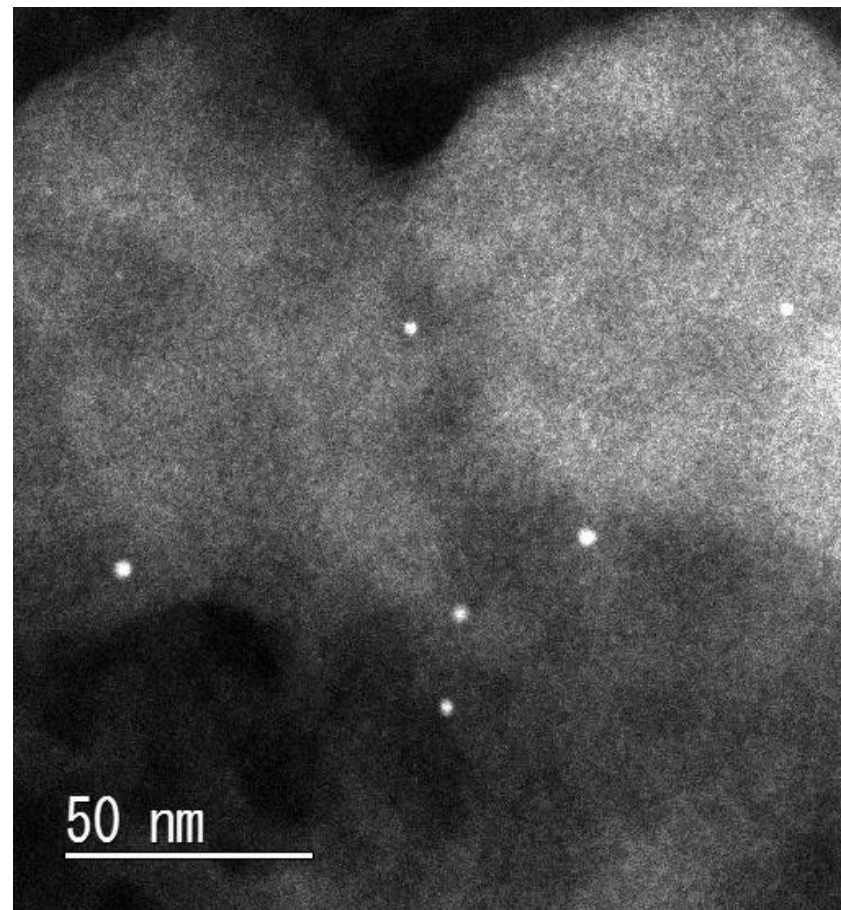

Au ion exchange → reduction →  
Pd ion exchange → reduction  
(Catalyst No. 2 in Table 1)  
STEM image 2-4

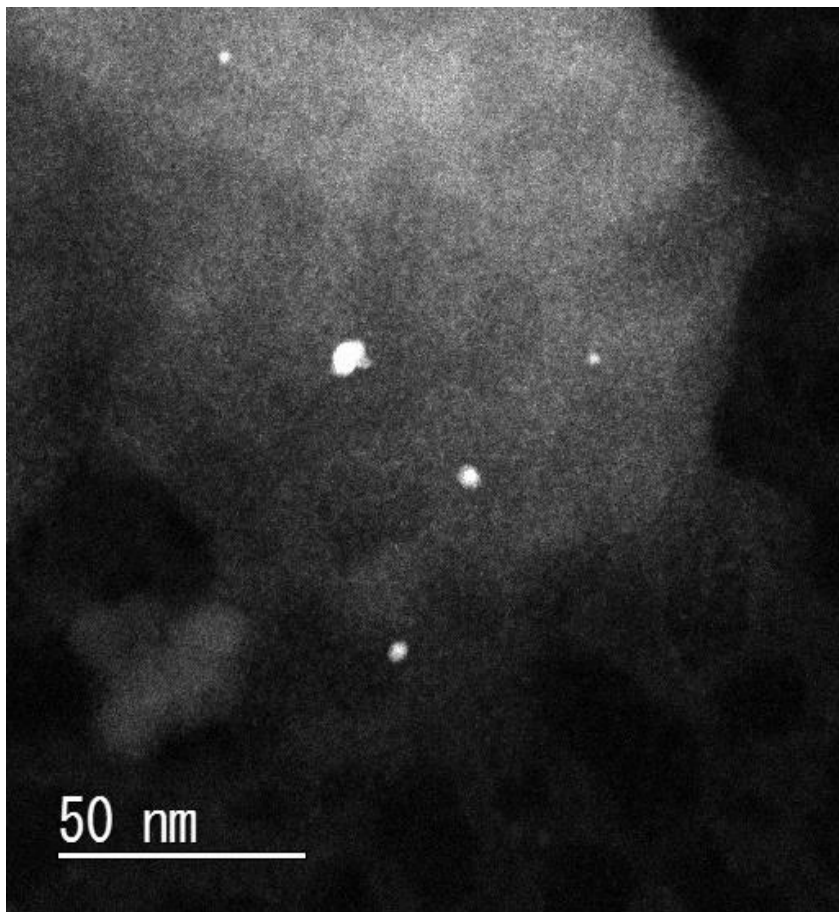

Au ion exchange → reduction →  
Pd ion exchange → reduction  
(Catalyst No. 2 in Table 1)  
STEM image 2-5

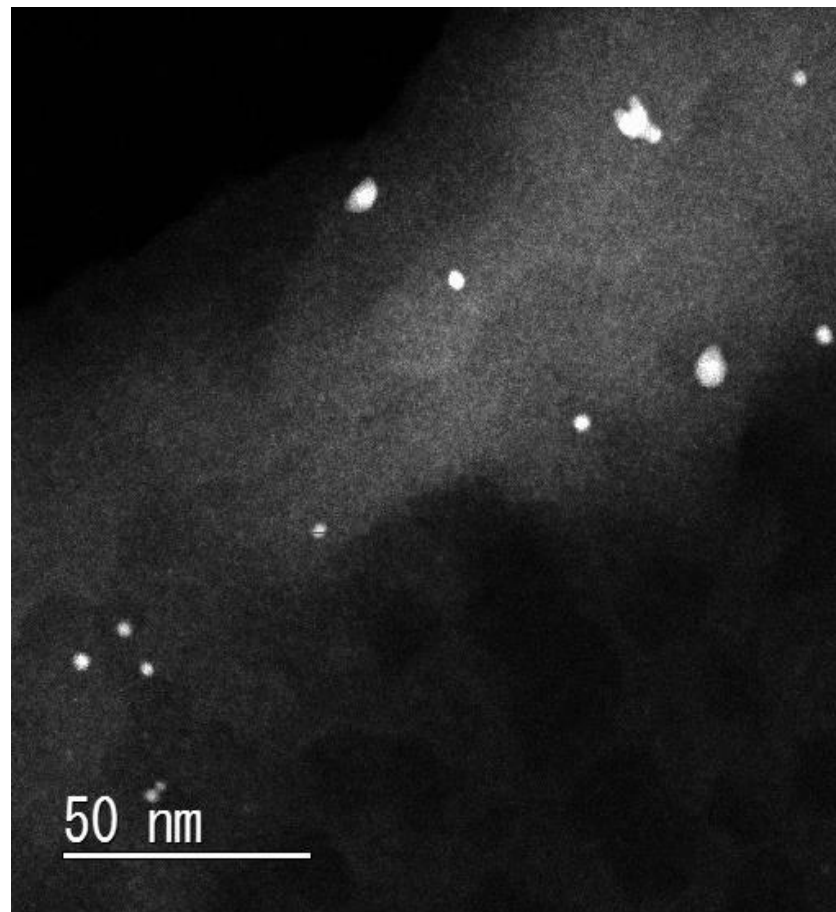

Au ion exchange → reduction →  
Pd ion exchange → reduction  
(Catalyst No. 2 in Table 1)  
STEM image 2-6



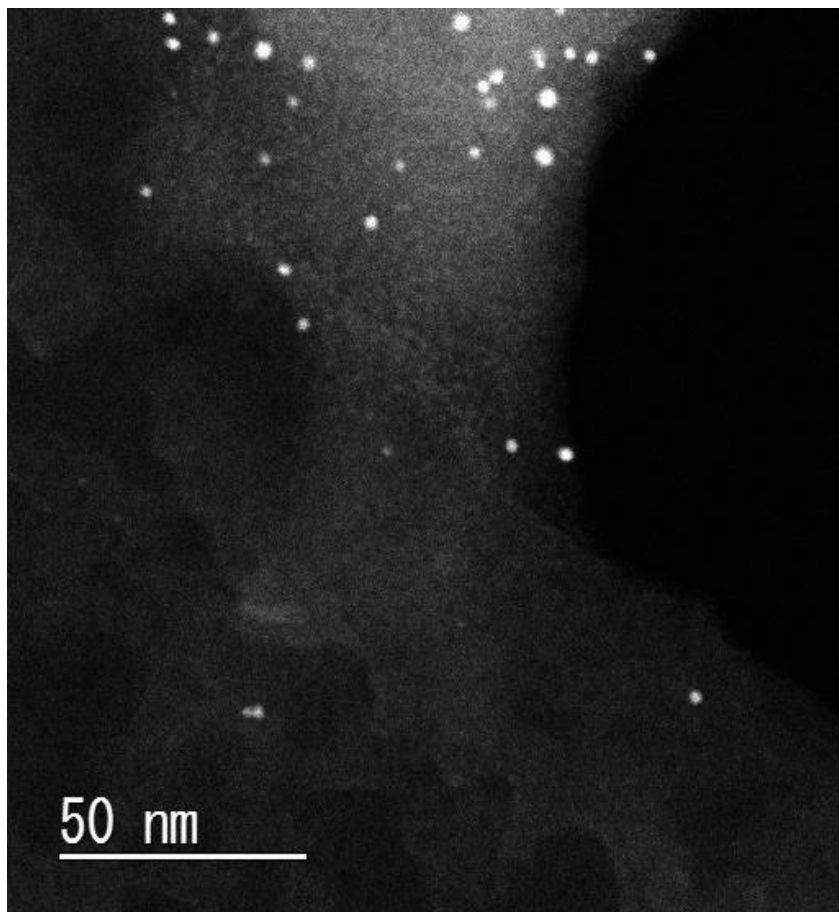

Au ion exchange → reduction →  
Pd ion exchange → reduction  
(Catalyst No. 2 in Table 1)  
STEM image 2-7

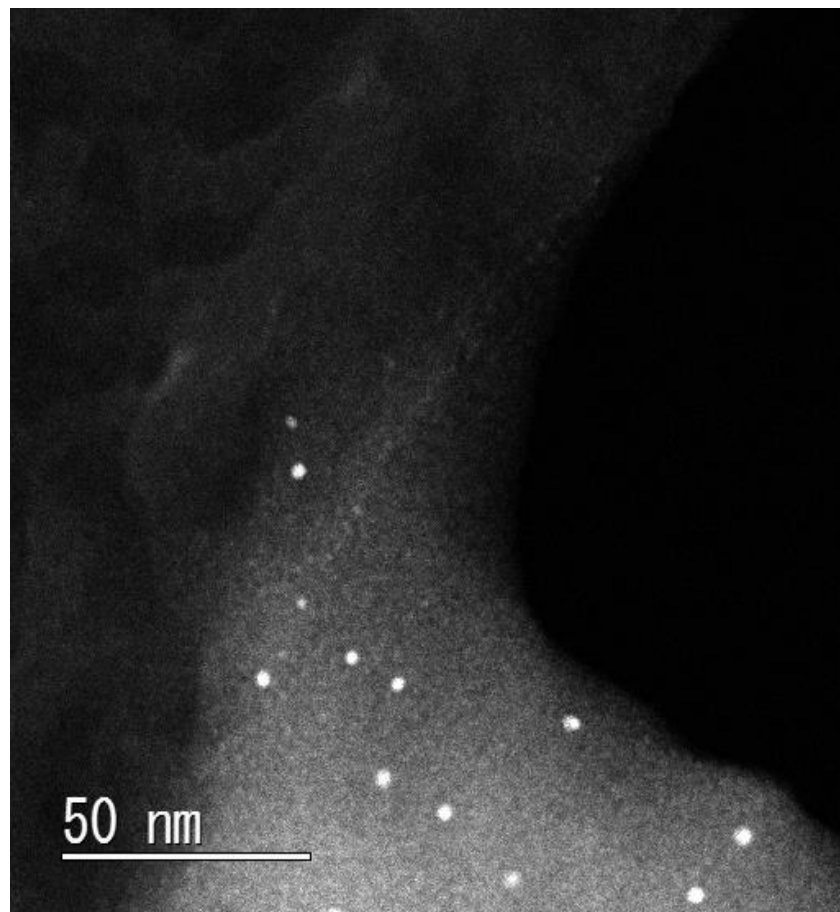

Au ion exchange → reduction →  
Pd ion exchange → reduction  
(Catalyst No. 2 in Table 1)  
STEM image 2-8

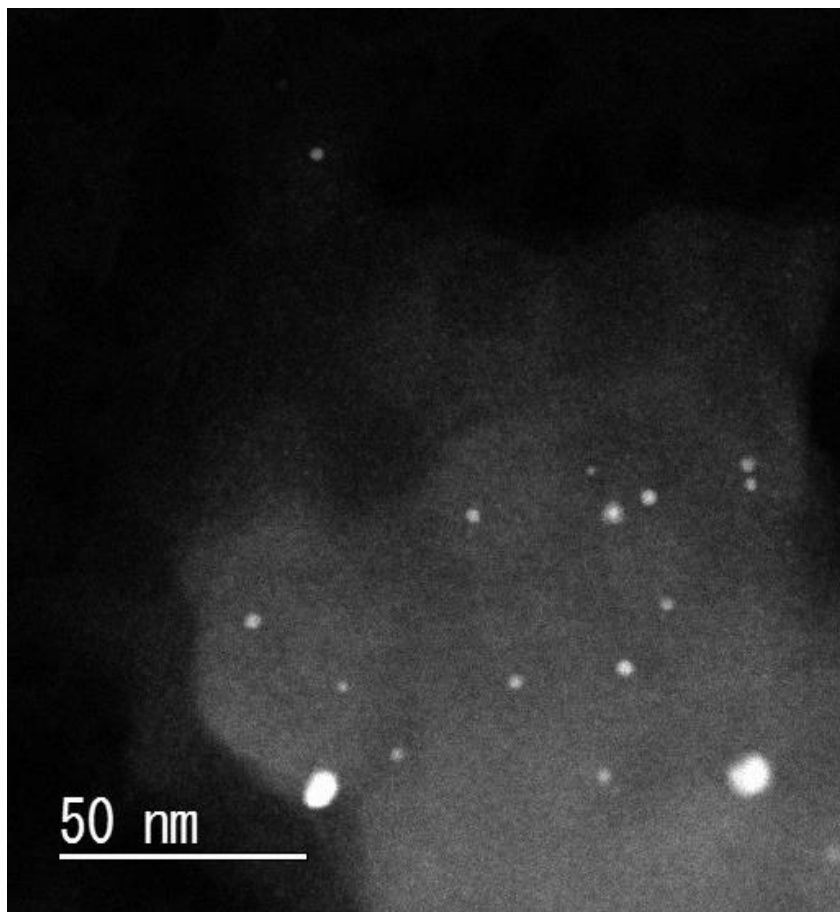

Au ion exchange → reduction →  
Pd ion exchange → reduction  
(Catalyst No. 2 in Table 1)  
STEM image 2-9

All STEM images for measuring particle size distribution (Catalyst No.3)

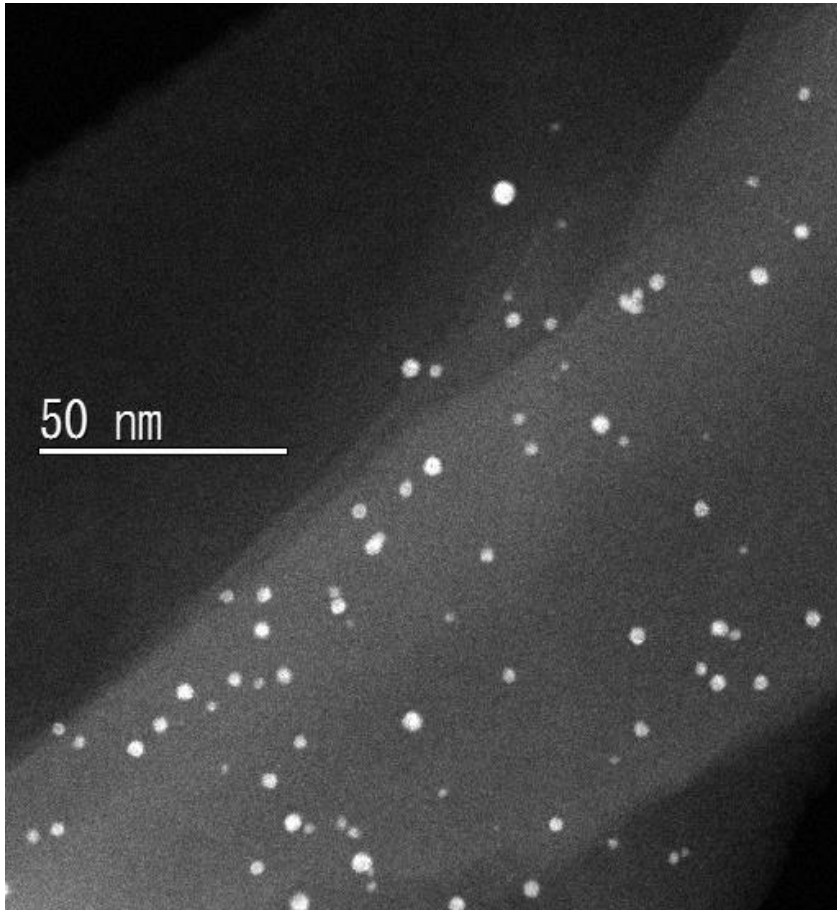

Pd ion exchange → reduction →  
Au ion exchange → reduction  
(Catalyst No. 3 in Table 1)  
STEM image 3-1



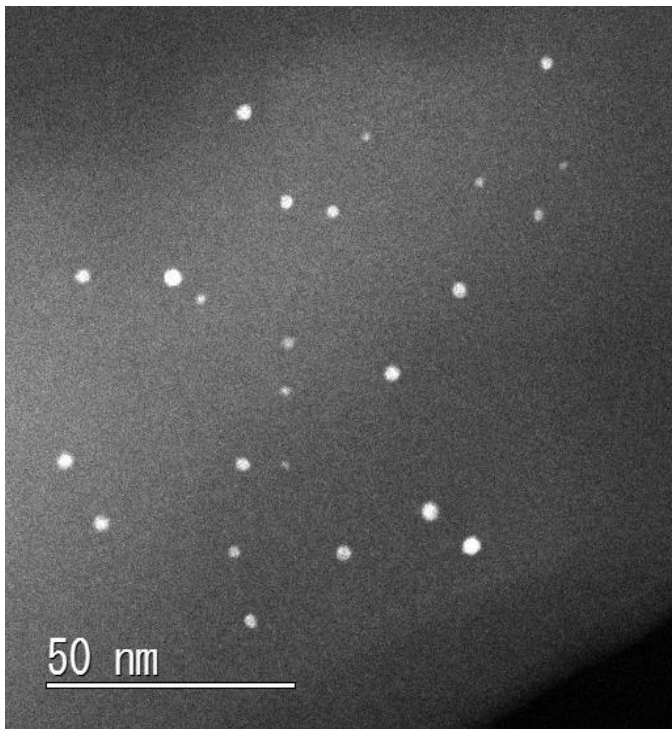

Pd ion exchange → reduction →  
Au ion exchange → reduction  
(Catalyst No. 3 in Table 1)  
STEM image 3-2

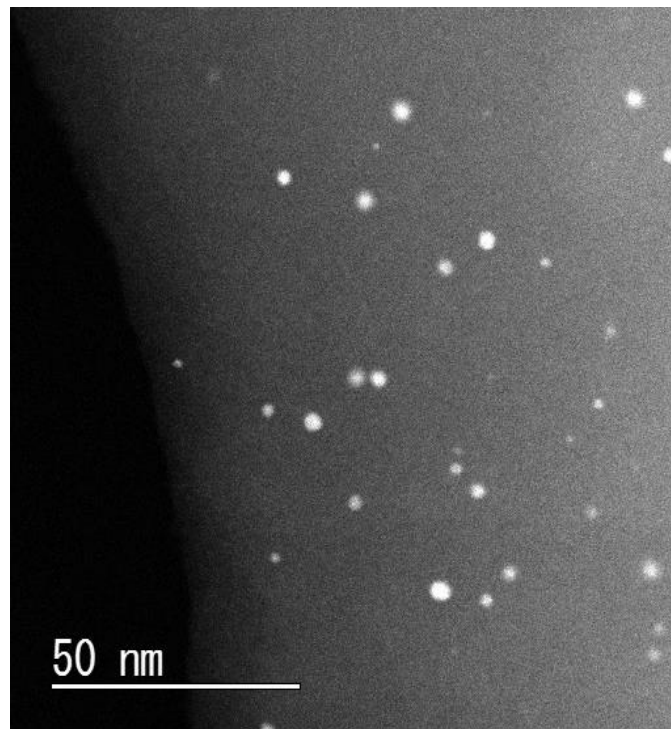

Pd ion exchange → reduction →  
Au ion exchange → reduction  
(Catalyst No. 3 in Table 1)  
STEM image 3-3
